# Supplementary material for: An XPS/AES comparative study of the surface behaviour of nano-silicon anodes for Li-ion batteries
Source: Royal Society of Chemistry journal article supplement (doi:10.1039/c3ja50362c), 2014-01-01

Supplementary data for

# An XPS/AES comparative study of the surface behaviour of nano-silicon anodes for Li-ion batteries

**Figure S1.** Beginning of the galvanostatic curve corresponding to the first lithiation of Si electrodes

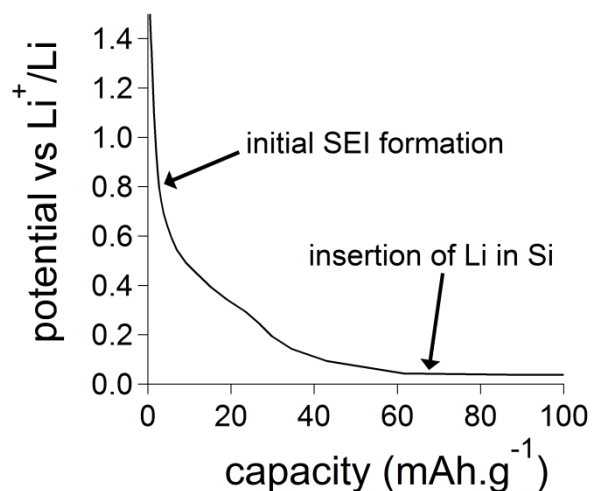

**Figure S2.** Surface analyses of electrode B after a lithiation of 360 mAh.g<sup>-1</sup> a) XPS spectra (F 1s and P 2p core peaks) and b) P LVV and F KLL Auger transition.

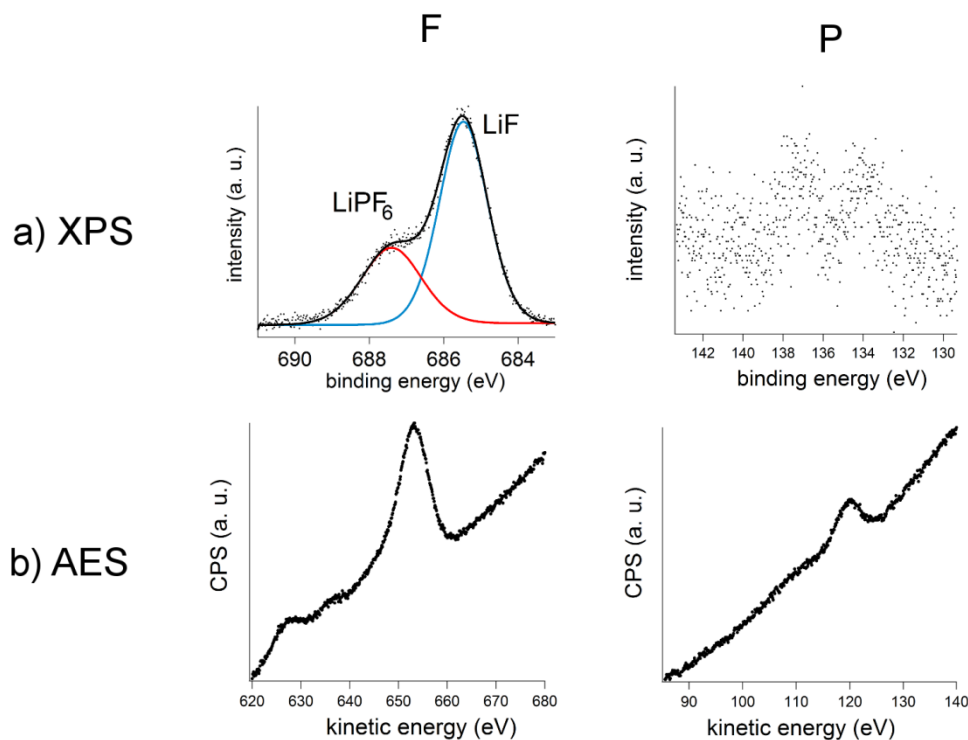

**Figure S3.** SEM images of the investigated particle before and after sputtering.

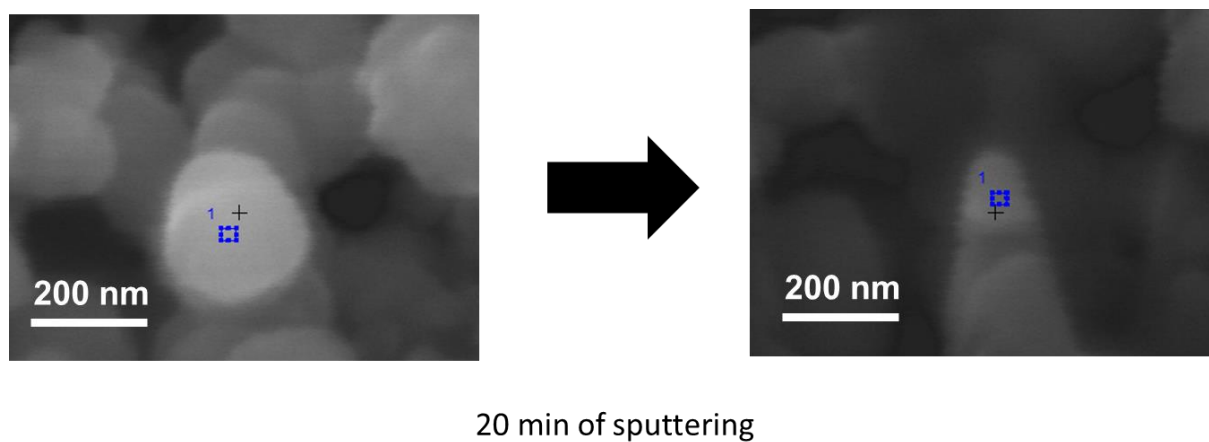

**Figure S4.** SEM image and Li Auger spectrum obtained at the surface of electrode C, after a full lithiation a) for a silicon particle and b) for a carbon fiber. The analyzed area is represented by a blue square on the SEM image.

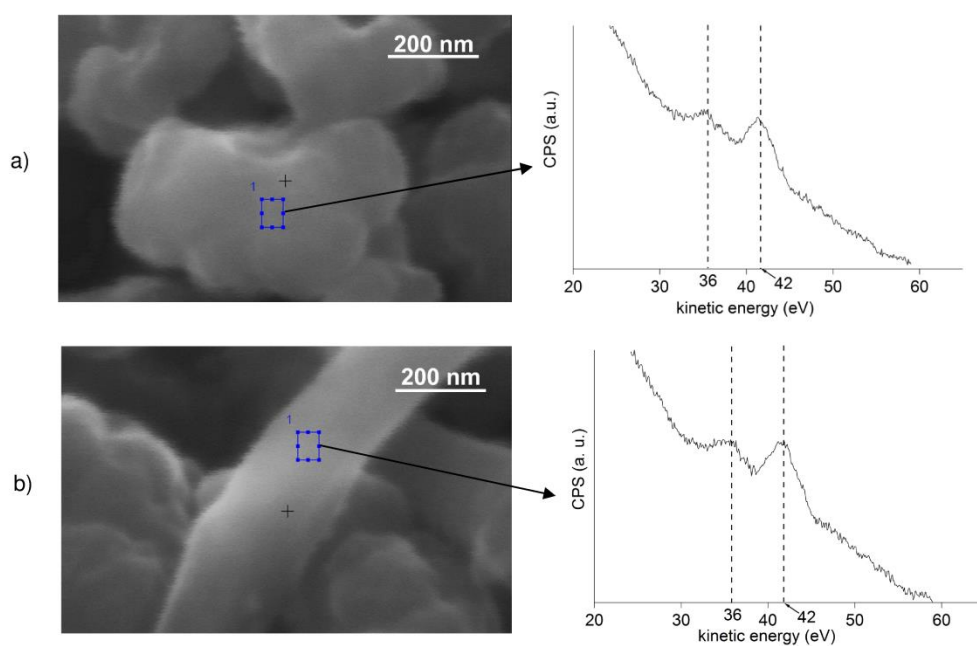

**Figure S5.** F 1s spectra obtained for electrodes B, C, and D

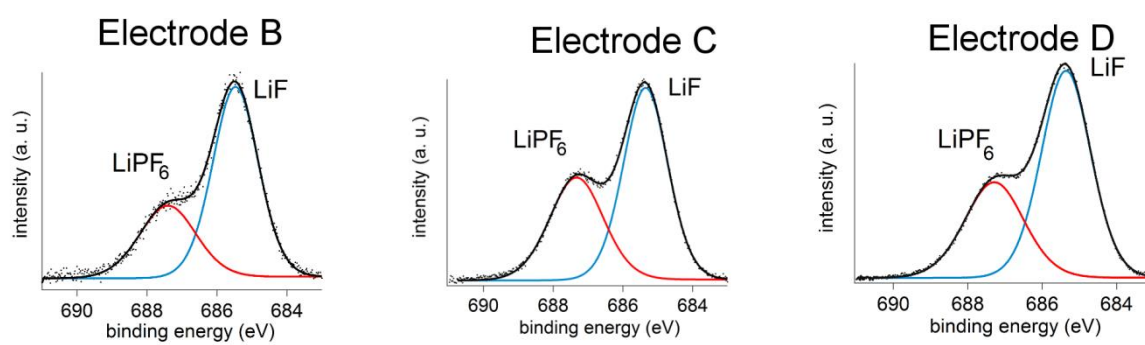

Supplement: c3ja50362c1.pdf [file c3ja50362c1.pdf]
